# Supplementary material for: Two near-infrared phosphorescent iridium(iii) complexes for the detection of GSH and photodynamic therapy
Source: Royal Society of Chemistry journal article supplement (doi:10.1039/d3dt01826a), 2023-01-01
Supplement: d3dt01826a1.pdf [file d3dt01826a1.pdf]

# Supporting Information

## Two near-infrared phosphorescent iridium(III) complexes for detection of GSH and photodynamic therapy

Rui Tu, Jie Liu, Weibin Chen, Fengfu Fu, Mei-Jin Li\*

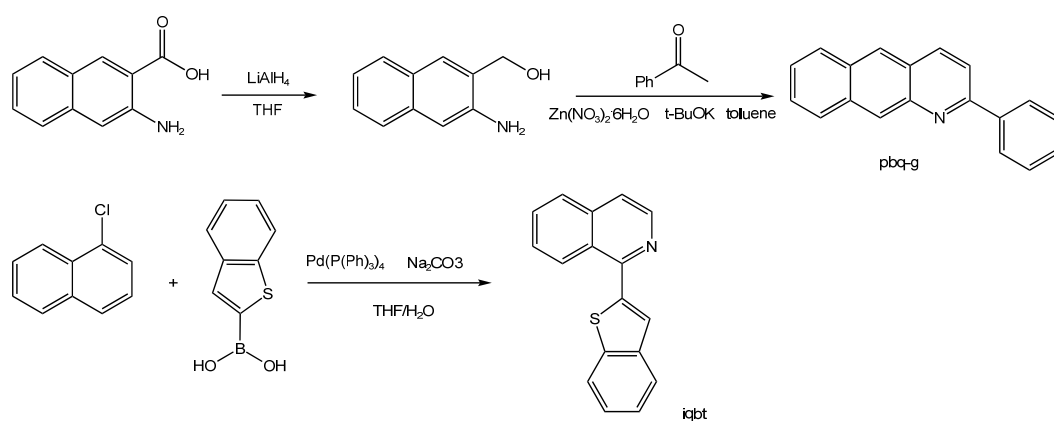

Scheme S1 Synthetic route to pbq-g, iqbt

† These authors contributed equally to this work.

\* Corresponding author. E-mail address: mjli@fzu.edu.cn

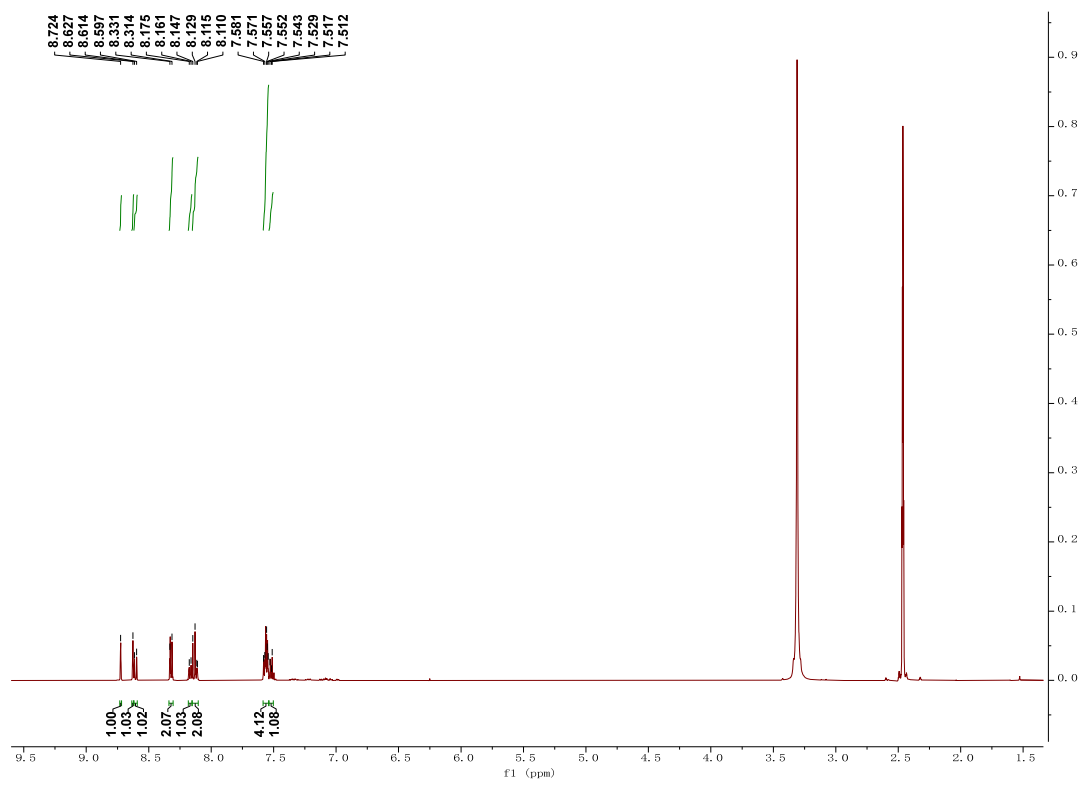

Fig.S1 <sup>1</sup>H NMR (400 MHz, DMSO-*d*<sub>6</sub>) spectrum of pbq-g

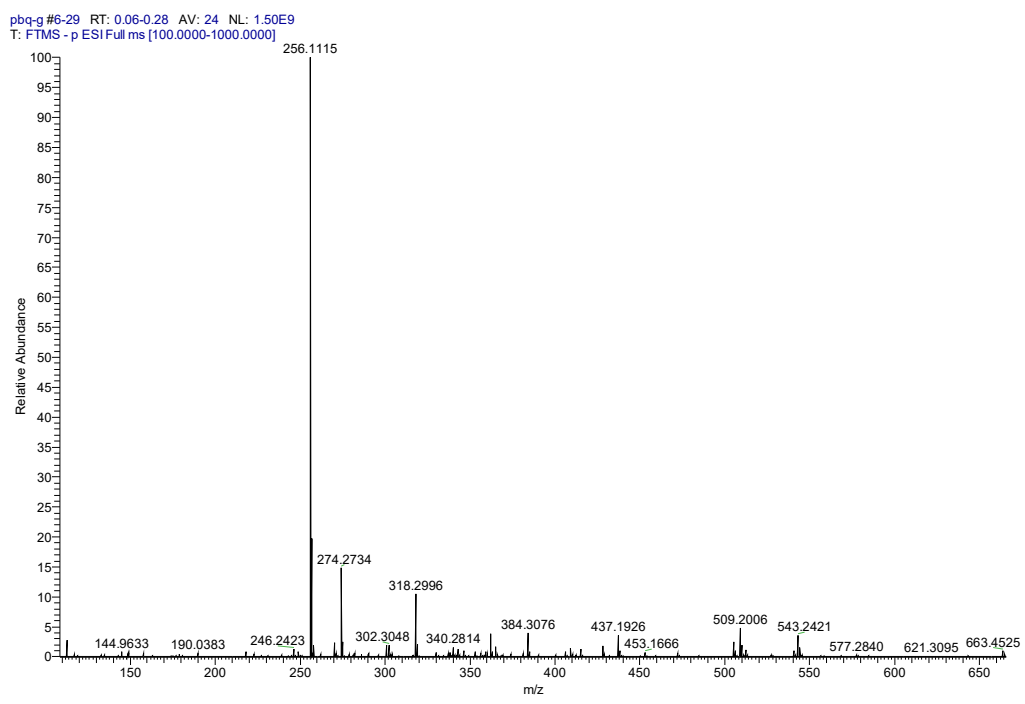

Fig.S2 ESI-MS of pbq-g:  $m/z=256.1115 \{M+H\}^+$

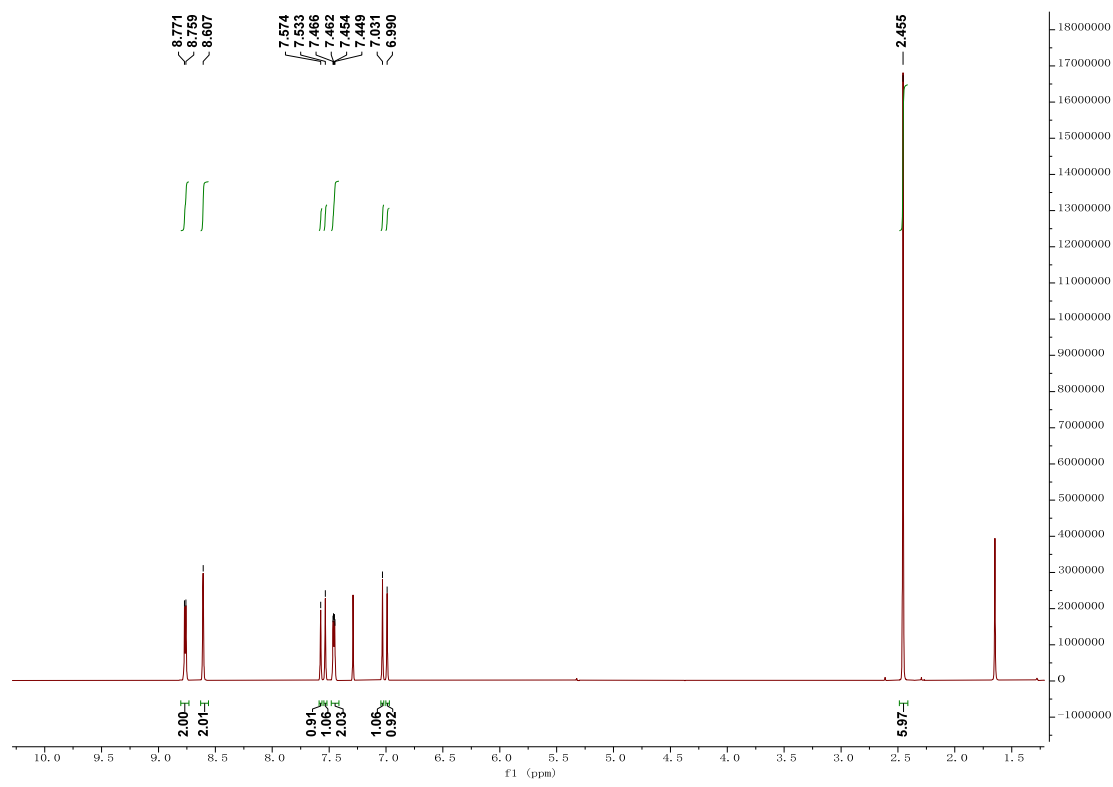

Fig.S3 <sup>1</sup>H NMR (400 MHz, CDCl<sub>3</sub>) spectrum of L

byp-ace #12-21 RT: 0.12-0.21 AV: 10 NL: 1.93E9  
 T: FTMS - p ESI Full ms [200.0000-2000.0000]

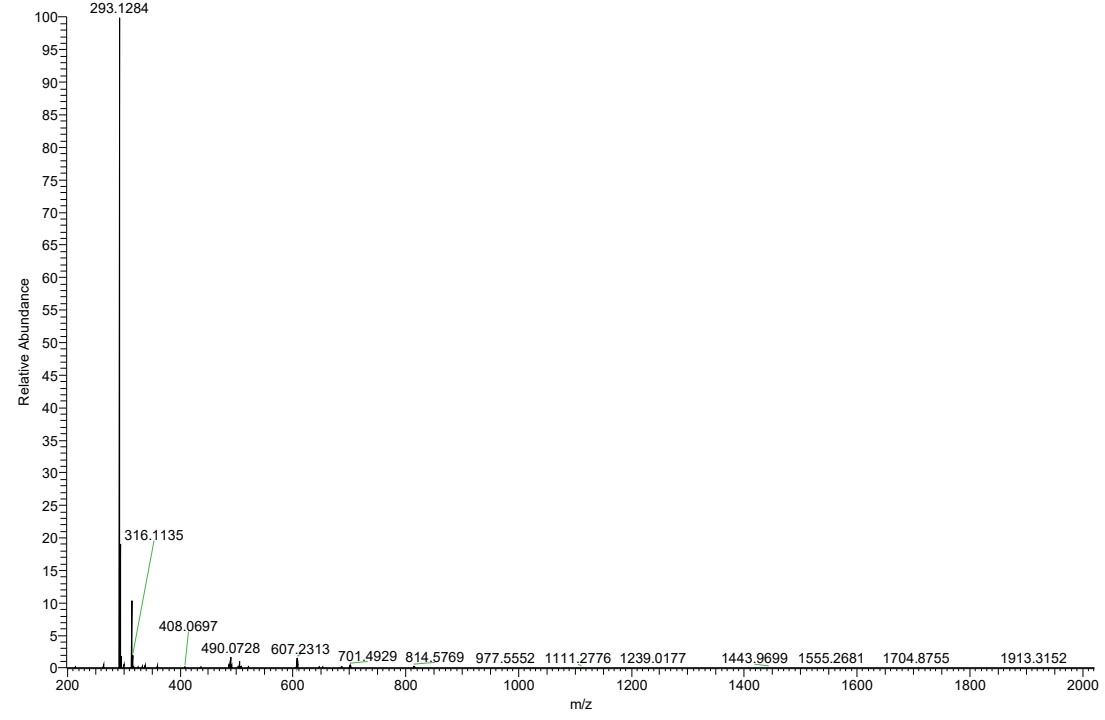

Fig.S4 ESI-MS of L: m/z=293.1284 {M+H}<sup>+</sup>

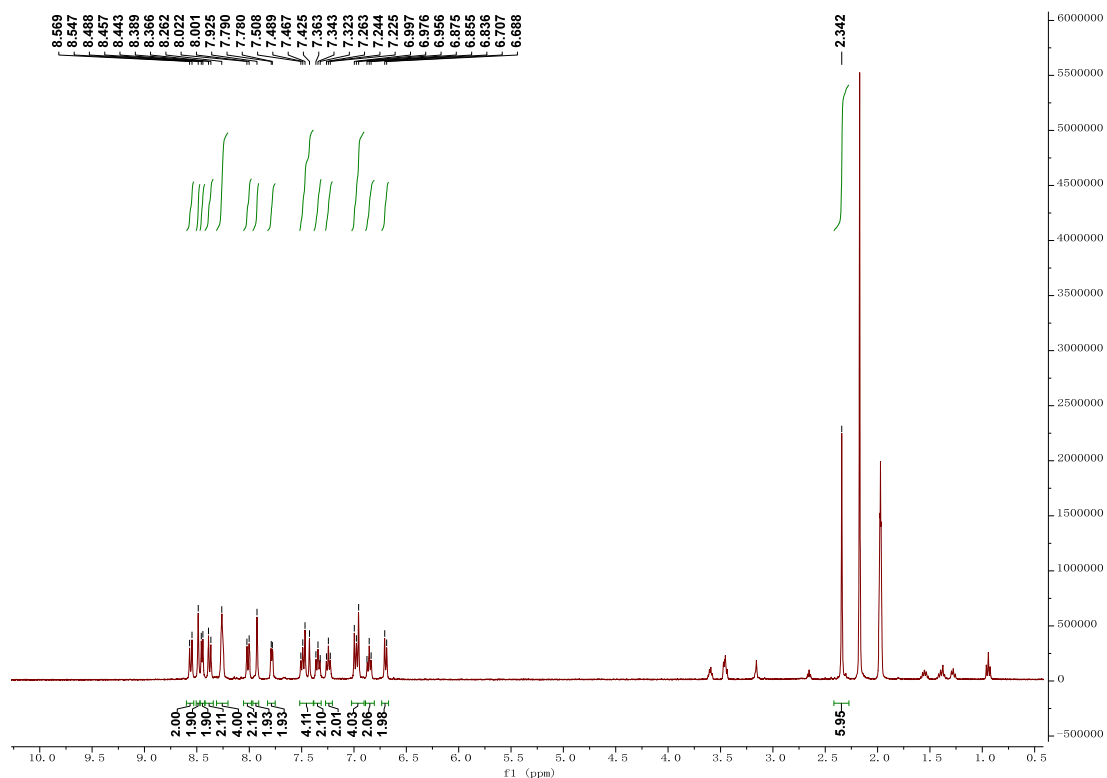

Fig.S5(a)  $^1\text{H}$  NMR (400 MHz,  $\text{CD}_3\text{CN}$ ) spectrum of  $[\text{Ir}(\text{pbq-g})_2\text{L}]\text{PF}_6$

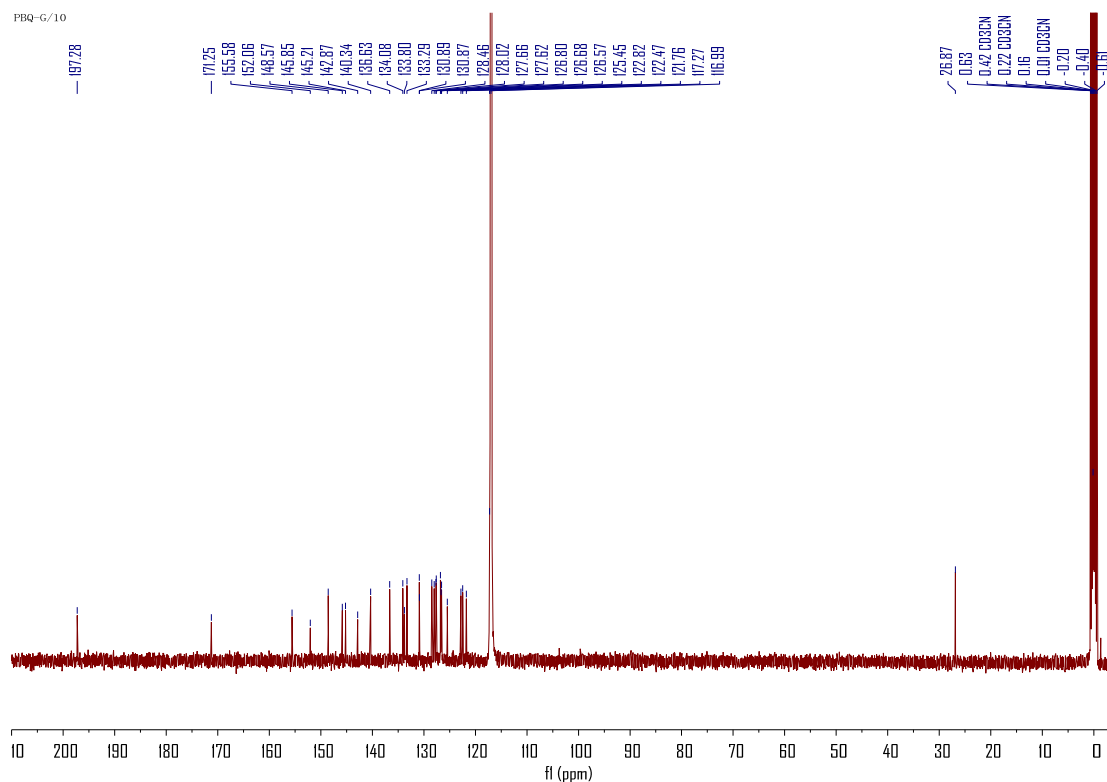

Fig.S5(b)  $^{13}\text{C}$  NMR (101 MHz,  $\text{CD}_3\text{CN}$ ) spectrum of  $[\text{Ir}(\text{pbq-g})_2\text{L}]\text{PF}_6$

[Ir(pbq-g)<sub>2</sub>byp-acePF<sub>6</sub> #27-45 RT: 0.18-0.27 AV: 19 NL: 1.56E8  
T: FTMS + p ESI Full ms [200.0000-2000.0000]

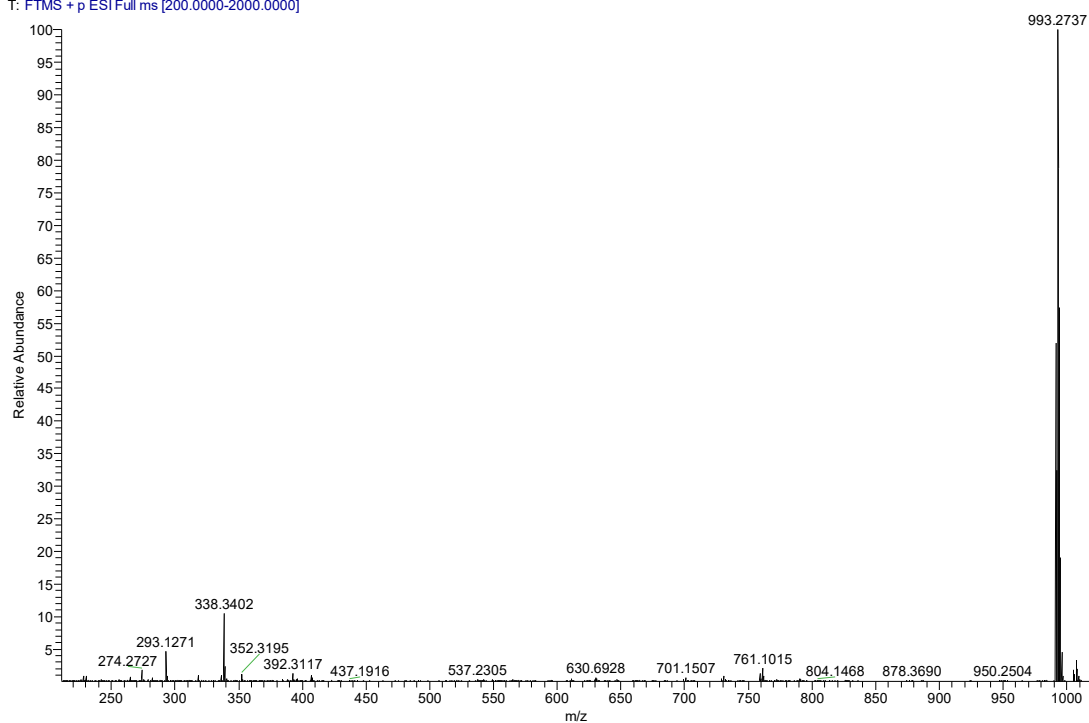

Fig.S6 ESI-MS of [Ir(pbq-g)<sub>2</sub>L]PF<sub>6</sub>: m/z=993.2737 {M-PF<sub>6</sub>}<sup>+</sup>

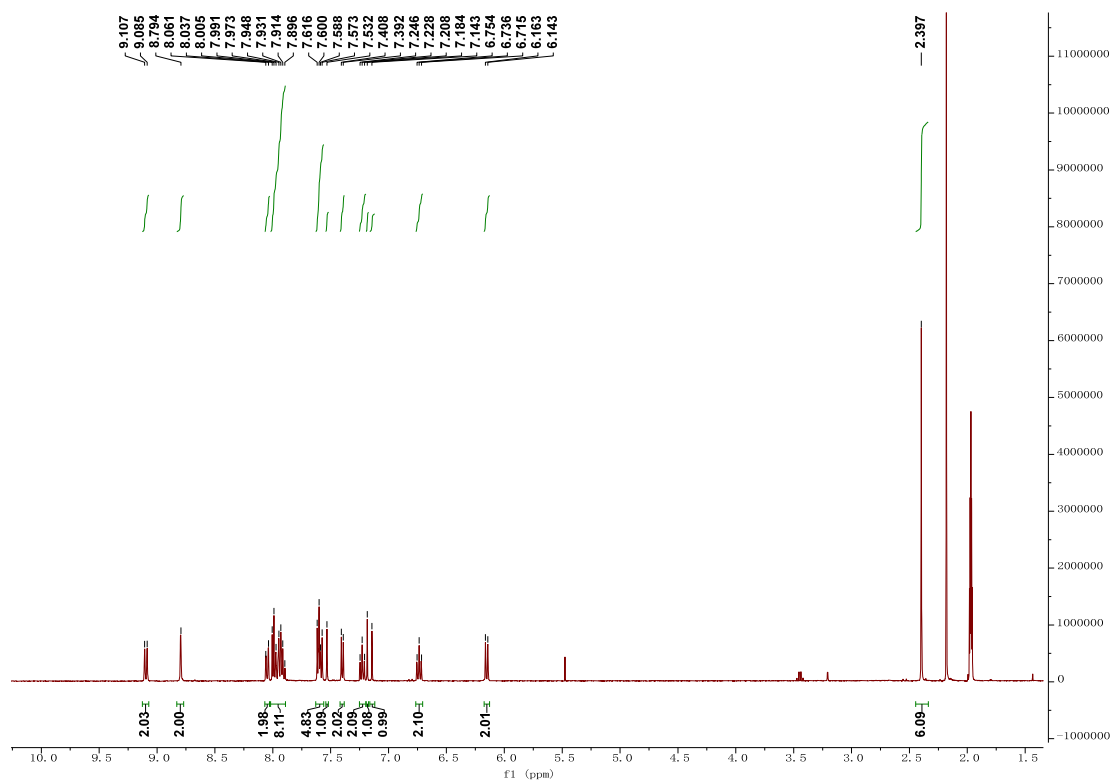

Fig.S7(a) <sup>1</sup>H NMR (400 MHz, CD<sub>3</sub>CN) spectrum of [Ir(iqbt)<sub>2</sub>L]PF<sub>6</sub>

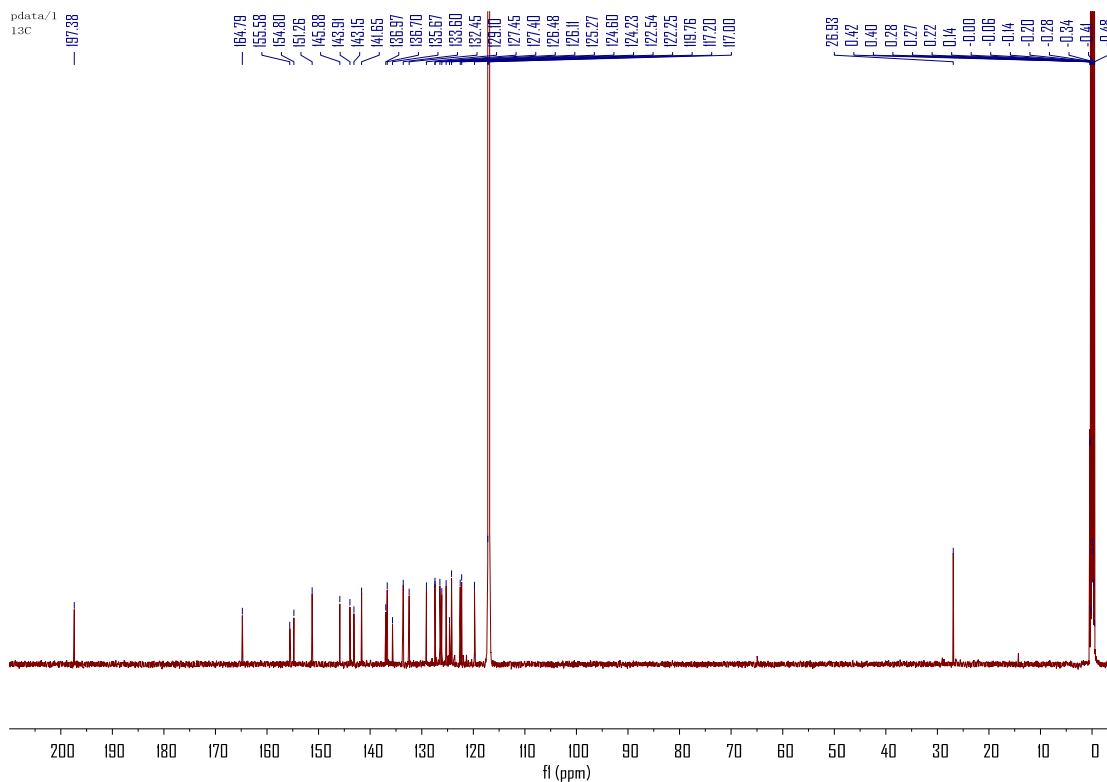

Fig.S7(b)  $^{13}\text{C}$  NMR (151 MHz,  $\text{CD}_3\text{CN}$ ) spectrum of  $[\text{Ir}(\text{iqbt})_2\text{L}]\text{PF}_6$

Ir(iqbt)2bpy-acePF6 #8-45 RT: 0.06-0.27 AV: 38 NL: 1.32E8  
T: FTMS + p ESI Full ms [200.0000-2000.0000]

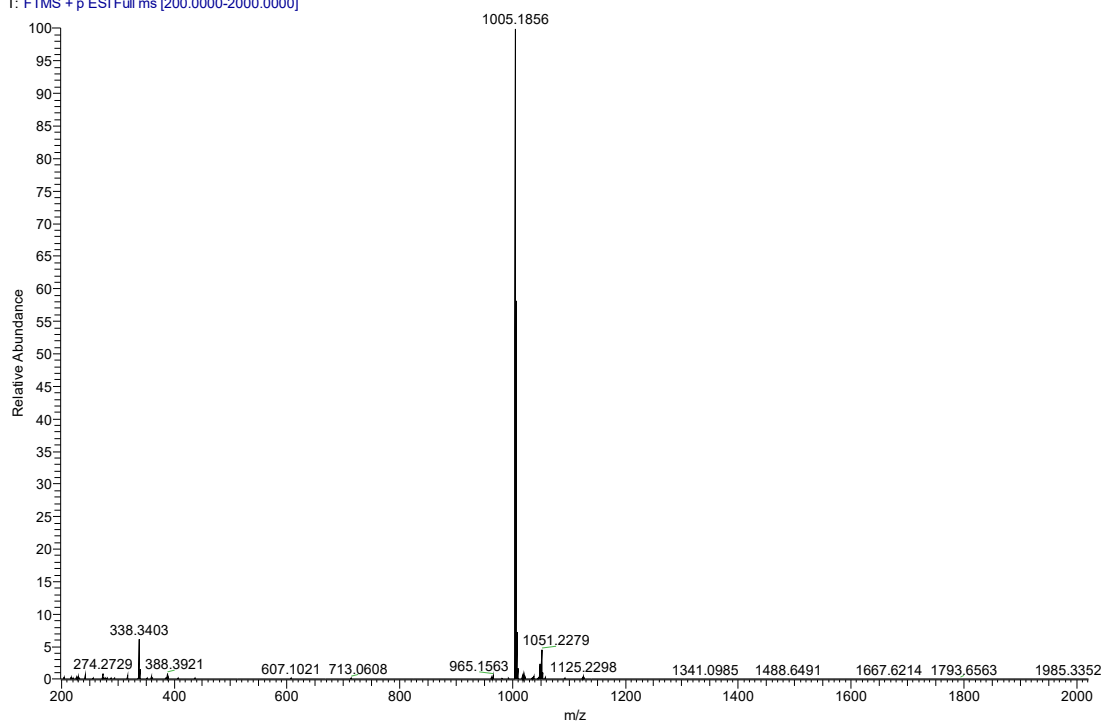

Fig.S8 ESI-MS of  $[\text{Ir}(\text{iqbt})_2\text{L}]\text{PF}_6$ :  $m/z=1005.1856 \{M-\text{PF}_6\}^+$

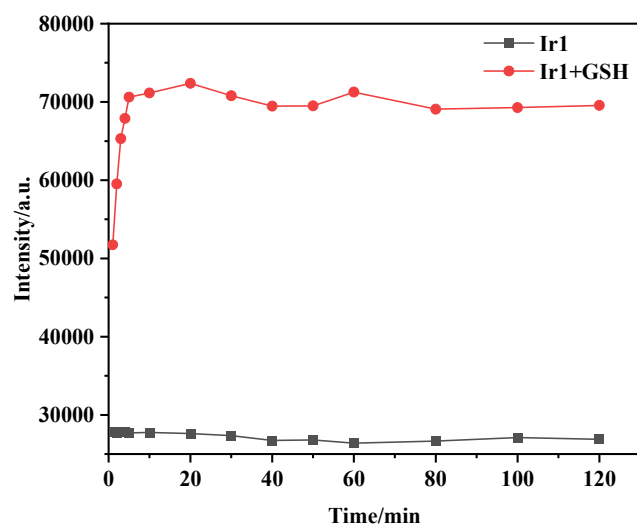

Fig.S9 Change of PL intensity of **Ir1**(10 $\mu$ M) and **Ir1**(10 $\mu$ M) +GSH (100 $\mu$ M) with different time.  $\lambda_{ex}$ =450 nm,  $\lambda_{em}$ =704 nm.

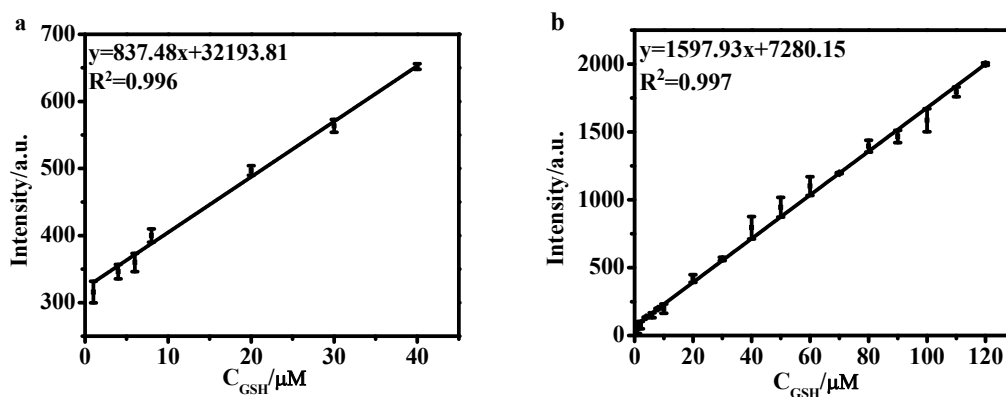

Fig.S10 A plot of the luminescence intensity of complexes as a function of GSH concentration for (a) **Ir1**+GSH(1.0-40  $\mu$ M) ( $\lambda_{ex}$ =450 nm,  $\lambda_{em}$ =704 nm) in DMSO-phosphate buffer solution (10 mM, pH = 7.4, 2:3, v/v) and (b) **Ir2**+GSH (0.5-120  $\mu$ M) ( $\lambda_{ex}$ =520 nm,  $\lambda_{em}$ =684 nm) in DMSO-phosphate buffer solution (10 mM, pH = 7.4, 4:1, v/v)

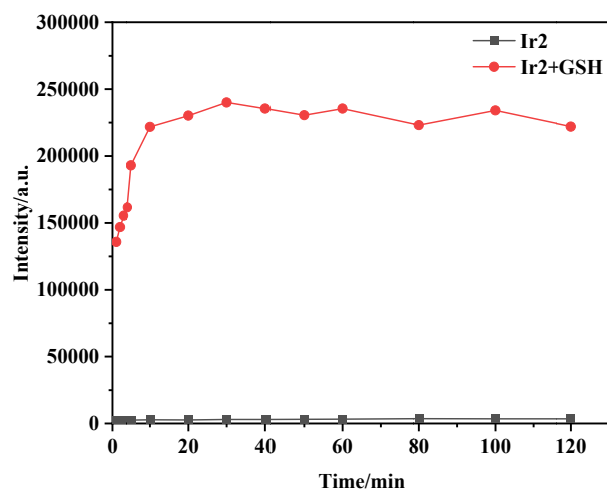

Fig.S11 Change of PL intensity of **Ir2**(10 $\mu$ M) and **Ir2**(10 $\mu$ M) + GSH(150 $\mu$ M) with different time.  $\lambda_{ex}$ =520 nm,  $\lambda_{em}$ =684 nm.

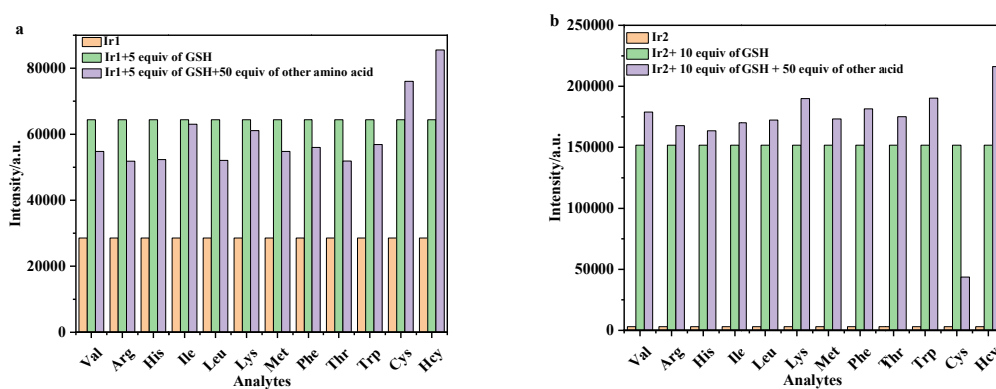

Fig.S12 (a) The behavior of **Ir1** (10  $\mu$ M) toward GSH and other related analytes in DMSO-PBS buffer solution (10 mM, pH = 7.4, 2:3, v/v).  $\lambda_{ex}$  = 450 nm,  $\lambda_{em}$  = 704 nm; (b) The behavior of **Ir2** (10  $\mu$ M) toward GSH and other related analytes in DMSO-PBS buffer solution (10 mM, pH = 7.4, 4:1, v/v).  $\lambda_{ex}$  = 520 nm,  $\lambda_{em}$  = 684 nm

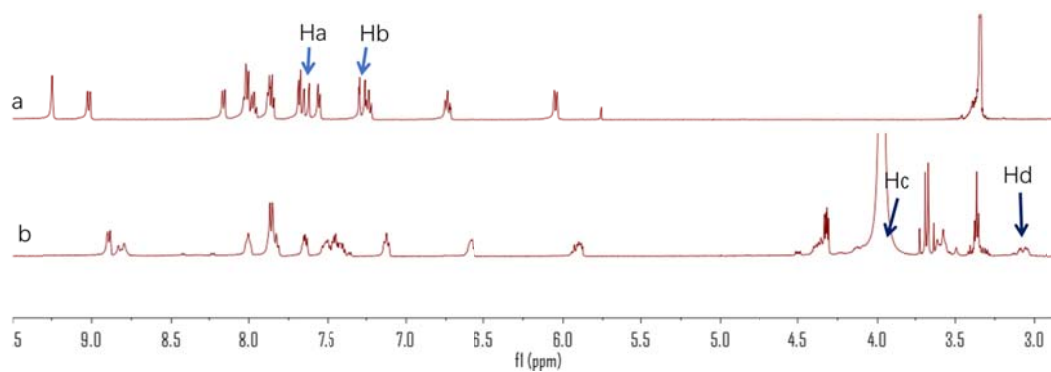

Fig.S13  $^1\text{H}$  NMR spectra of (a) **Ir2** and (b) **Ir2** + GSH in DMSO- $\text{D}_2\text{O}$  solution (4:1, v/v)



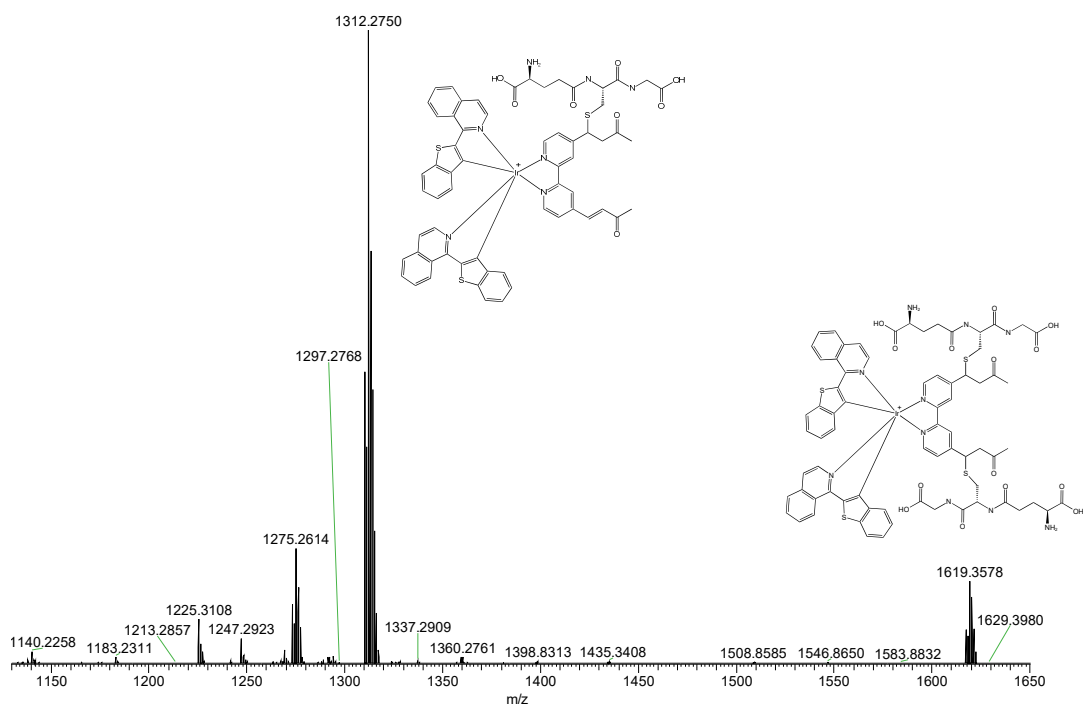

Fig.S14 ESI-MS of Ir2 + GSH

Table S1 Coordination probes of GSH detection as reporter

| Structure | $\lambda_{ex}/$<br>nm | $\lambda_{em}/$<br>nm | Response<br>time | LOD              | Linear<br>range | Test condition                                          | Ref |
|-----------|-----------------------|-----------------------|------------------|------------------|-----------------|---------------------------------------------------------|-----|
|           | 405                   | 704                   | 6min             |                  | 0-40<br>$\mu$ M | DMSO:PBS(pH<br>7.4, v/v, 1:9)                           | 1   |
|           | 400                   | 595                   |                  | 2.34<br>$\mu$ M  | 0-40<br>$\mu$ M | CH <sub>3</sub> CN:HEPES<br>(10 mM, pH<br>7.4, v/v,1:1) | 2   |
|           | 480                   | 628                   | 15min            | 0.138<br>$\mu$ M | 0-16<br>$\mu$ M | Tris-HCl buffer<br>(50 mM pH<br>7.4)                    | 3   |
|           | 458                   | 625                   |                  | 1 $\mu$ M        | 5-90<br>$\mu$ M | ethanol:HEPES<br>buffer (50 mM<br>pH 7.2, v/v,1:4)      | 4   |

|                                                                                    |     |     |       |            |                |                                                    |              |
|------------------------------------------------------------------------------------|-----|-----|-------|------------|----------------|----------------------------------------------------|--------------|
| 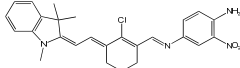  | 653 | 720 | 25s   | 0.25<br>μM | 0-16<br>μM     | DMSO:HEPES<br>(10 mM, pH<br>7.4, v/v, 1:10)        | 5            |
|   |     | 586 | 20min | 0.25<br>μM | 0-20<br>μM     | PBS (10 mM,<br>pH 7.4)                             | 6            |
|   | 480 | 542 | 20min | 0.83<br>μM | 0-80<br>μM     | DMSO:PBS (pH<br>7.4, v/v,1:9)                      | 7            |
|   | 510 | 557 | 3s    | 49.6<br>μM | 0-5m<br>M      | Ethanol:Tris-H<br>Cl (10 mM, pH<br>7.45, v/v, 5:5) | 8            |
|   | 450 | 704 | 5min  | 0.38<br>μM | 1.0-40<br>μM   | DMSO:PBS(pH<br>7.4, v/v, 2:3)                      | This<br>work |
|  | 520 | 684 | 10min | 0.17<br>μM | 0.5-12<br>0 μM | DMSO:PBS(pH<br>7.4, v/v, 4:1)                      | This<br>work |

Table S2 Complex **Ir2** and **Ir2-GSH** photophysical properties data in DMSO

| Complex        | $\lambda_{\text{abs}}$ ( $\epsilon / 10^4 \text{ dm}^3 \text{ mol}^{-1} \text{ cm}^{-1}$ ) | $\lambda_{\text{ex}}$<br>/nm | $\lambda_{\text{em}}$<br>/nm | t<br>/ns | $\Phi$ |
|----------------|--------------------------------------------------------------------------------------------|------------------------------|------------------------------|----------|--------|
| <b>Ir2-GSH</b> | 259(3.9), 287(3.1), 309(3.1),<br>362(1.9), 482(0.8)                                        | 494                          | 684,<br>748                  | 412      | 0.014  |
| <b>Ir2</b>     | 281(4.2), 308(3.9), 345(2.6),<br>366(2.3), 489(0.9)                                        | 497                          | 686,<br>750                  | 206      | 0.002  |

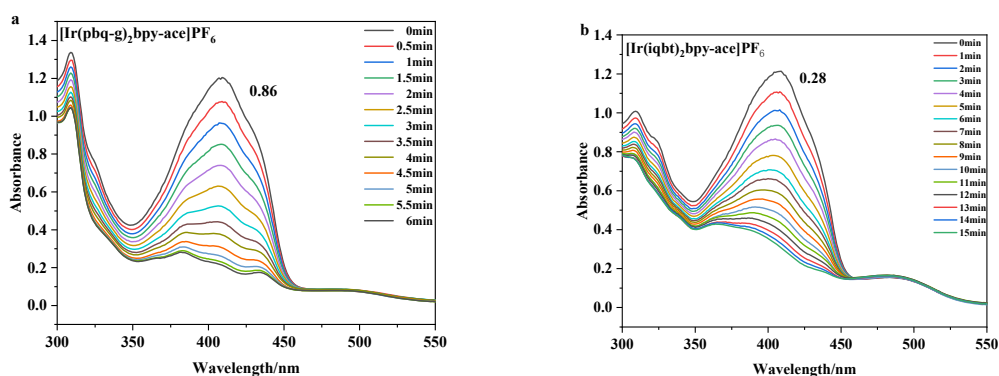

Fig.S15 UV-vis absorption spectra of a mixture of DPBF (50  $\mu\text{M}$ ) and (a) **Ir1** (10  $\mu\text{M}$ ); (b) **Ir2** (10  $\mu\text{M}$ ) in acetonitrile under irradiation at 450nm.

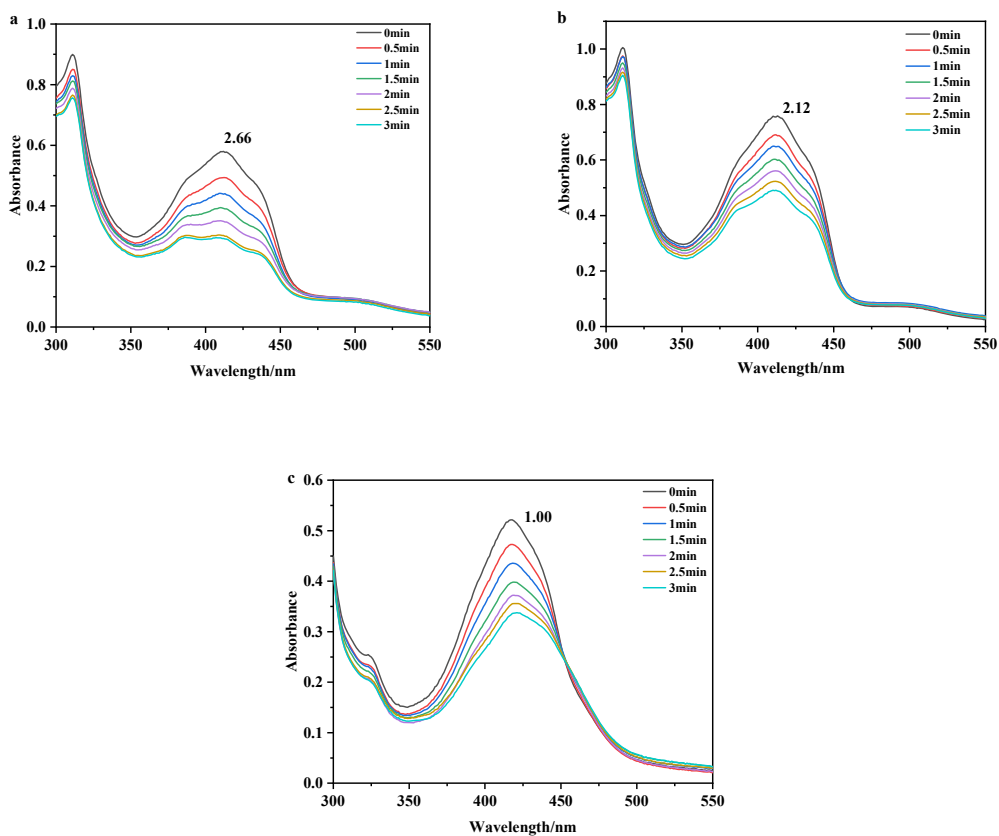

Fig.S16 The absorption spectra of a mixture of DPBF (50 $\mu\text{M}$ ) and (a) **Ir1**(10  $\mu\text{M}$ ); (b) **Ir1** (10  $\mu\text{M}$ ) +5 equiv. of GSH; (c) **Ru(bpy)<sub>3</sub><sup>2+</sup>** (10  $\mu\text{M}$ ) in DMSO-PBS buffer solution (10 mM, pH = 7.4, 2:3, v/v) under irradiation at 450nm.

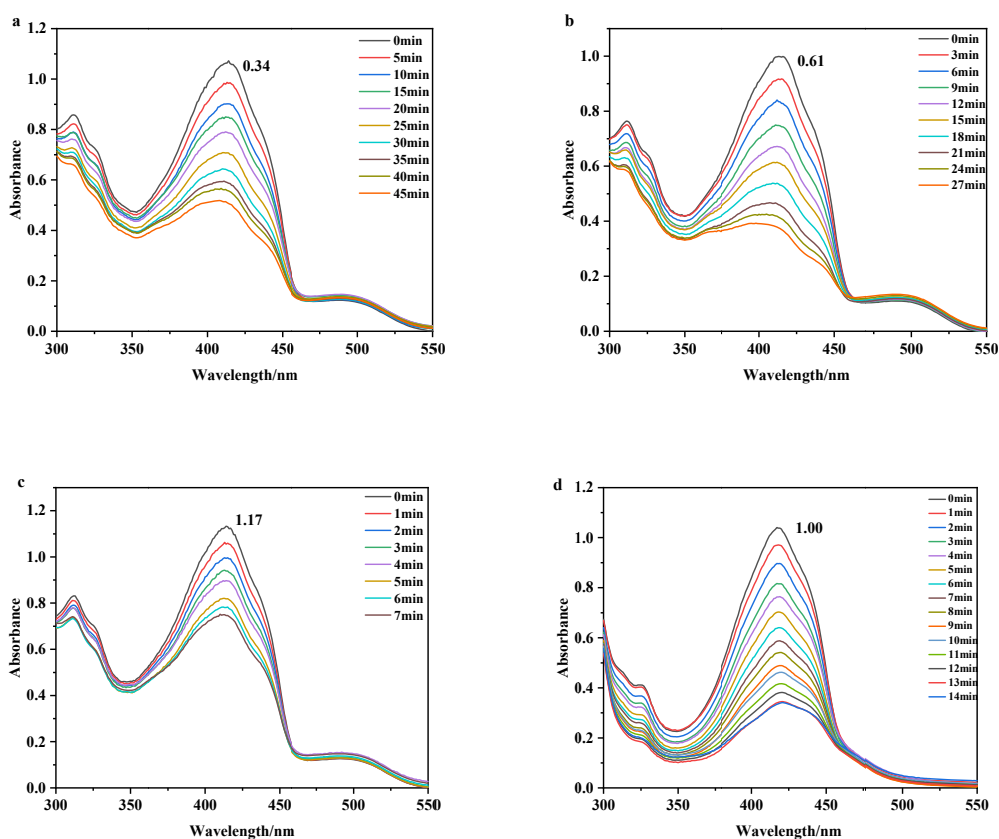

Fig.S17 The absorption spectra of a mixture of DPBF (50 $\mu$ M) and (a) **Ir2** (10  $\mu$ M); (b) **Ir2** (10  $\mu$ M) +10 equiv. of GSH; (c) **Ir2** (10  $\mu$ M) +20 equiv. of GSH; (d)  $\text{Ru}(\text{bpy})_3^{2+}$  (10  $\mu$ M) in DMSO-PBS buffer solution (10 mM, pH = 7.4, 4:1, v/v) under irradiation at 450nm.

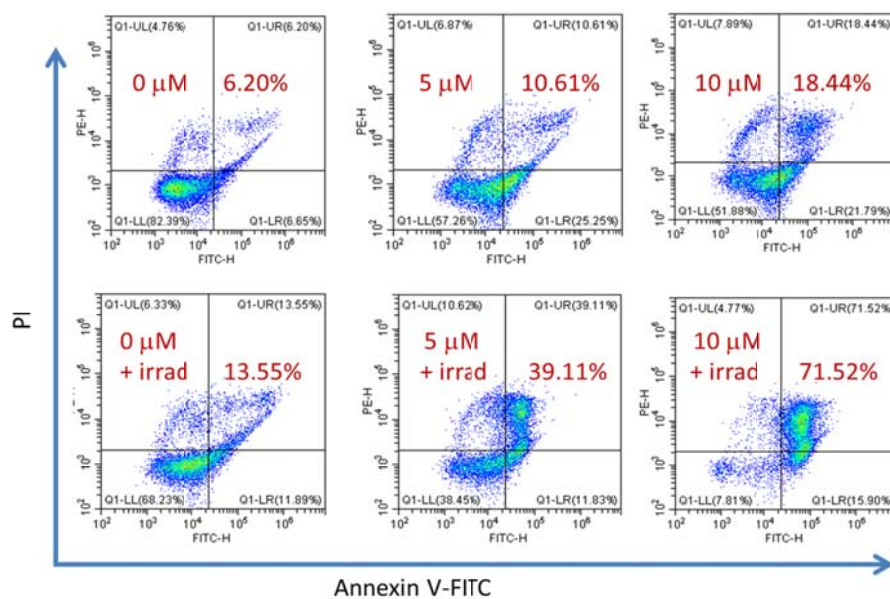

Fig. S18 Complex mediated cells apoptosis in dose-dependent and irradiation-dependent manner. Cells were treated with different dose of **Ir2** for 10 h without or under irradiation for 8min with 450nm light. Then the percentage of apoptosis cells was analyzed with flow cytometry.

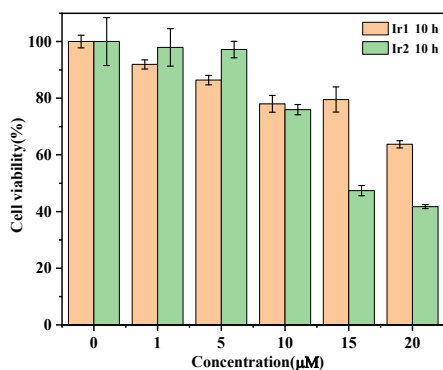

Fig.S19 Viability of HeLa cells in the presence of different concentrations of iridium(III) complexes

### References

- [1]. W. Wu, X. Liao, Y. Chen, L. Ji, and H. Chao. *Anal. Chem.*, 2021, 93, 8062-8070.
- [2] H. S. No, T. Kim, J. I Hong, *Sensor. Actuat. B. Chem*,2021,342,129868.
- [3] C. L. Liu, J. P. Liu, W. Z. Zhang, Y. L. Wang, Q. Liu, B. Song , J. L. Yuan and R. Zhang, *Adv. Sci.*, 2020, 7,2000458.
- [4] Z. Q. Ye, Q. K. Gao, X. An, B. Song, and J. L. Yuan, *Dalton Tran.*, 2015, 44, 8278-8283.
- [5] K. P. Wang, G. Nie, S. Q. Ran, H. L. Wang, X. Q. Liu, Z.M. Zheng and Y. Zhang, *Dyes Pigm.*, 2020, 172, 107837.
- [6] H. Y. Wang, L. Zhang, X. Jin, P. J. Tian and X. J. Ding, *RSC Adv.*, 2022,12 ,33922.
- [7] X. G. Chen, Y. Mei, Q.H Song, *Dyes Pigm.*,2022, 110312.
- [8] Z.L. Zhou, P. J. Li, Z. H. Liu, C. Y. Wu, Y. Y. Zhang and H. T. Li, *Talanta*, 2022,243, 123364.
